# Supplementary material
Source: publisher figshare collection journal article supplement (https://acs.figshare.com/ndownloader/files/3984844)
Supplement: Supplementary file 1 [file 3984844]

## Sheet: Table 1
a- Functional Categories: 1-Lipid Metabolism, 2-Intermediary Metabolism and Respiration, 3-Regulatory Proteins, 4- Conserved Hypotheticals, 5- Information Pathways, 6- Cell Wall and Cell Processes, 7- Virulence, Detoxification, Adaptation
b- An “X” indicates the presence of an N-terminal signal peptide predicted using SignalP v. 4.031
c-An “X” indicates presence of an N-terminal twin-arginine translocation (Tat) signal peptide using TatP v.1.0
d- Indicates the number of transmembrane domains predicted using TMHMM v. 2.030 (transmembrane domains corresponding to putative N-terminal signal peptides were omitted)
e – An “X” indicates a potential lipoprotein containing a lipobox-type signal peptide predicted using LipoP v. 1.0 34 or using a lipoprotein pattern search against the M. tuberculosis H37Rv genome 35
Protein ID	Locus	Gene Name	Description/Function	-log10 (p-value) (before imputing)	log2 (BCG/MTB) (before impute)	p value (after impute)	-log10 (p-value) (after imputing)	log2 (BCG/MTB) (after impute)	Functional Category a	SigP b	TatP c	TM HMM d	Lipoprotein e
NP_216675.1	Rv2159c		hypothetical protein	4.42719	-10.0417	1.35232e-06	5.86892	-10.5385	5
NP_215612.1	Rv1770		hypothetical protein	0	NaN	1.43731e-06	5.84245	-8.85671	4
NP_217879.1	Rv0933	pstB	phosphate ABC transporter ATP-binding protein	0	NaN	1.1298e-07	6.947	-8.5599	6				X
NP_216286.1	Rv1175c	fadH	"NADPH dependent 2,4-dienoyl-CoA reductase"	2.5277	-7.12133	3.7186e-06	5.42962	-8.20541	5
NP_214806.1	Rv1978		hypothetical protein	0	-7.80033	4.61233e-07	6.33608	-8.18698	6
YP_177976.1	Rv1769		hypothetical protein	0	-5.49159	1.40007e-05	4.85385	-8.09917	5
NP_216398.1	Rv2161c		hypothetical protein	0	NaN	6.18572e-08	7.20861	-7.74969	2
NP_215448.1	Rv2187	fadD15	long-chain-fatty-acid-CoA ligase	3.21586	-6.00844	2.53192e-05	4.59655	-7.68154	5
NP_215691.1	Rv1191		hypothetical protein	2.94626	-6.39113	1.02294e-06	5.99015	-7.58991	4
NP_214798.1	Rv3623	lpqG	lipoprotein LpqG	0	NaN	3.34026e-06	5.47622	-7.37163	4				X
NP_217474.1	Rv0221		hypothetical protein	0	-8.35609	6.3975e-06	5.19399	-7.36485	2
NP_216813.1	Rv2290	lppO	lipoprotein lppO	0	NaN	9.03733e-06	5.04396	-7.06782	6				X
YP_177770.1	Rv1513		hypothetical protein	0	NaN	1.8169e-05	4.74067	-6.59725	2
NP_216494.1	Rv1544		ketoacyl reductase	3.27794	-5.75728	0.000362285	3.44095	-6.48539	5
NP_216285.1	Rv3888c		hypothetical protein	1.34563	-3.76709	0.000346434	3.46038	-6.42899	5
NP_216214.1	Rv3876		hypothetical protein	0	-5.85301	4.41174e-06	5.35539	-6.42284	4
NP_217247.1	Rv0785		FAD-binding dehydrogenase	0	-4.50946	4.71531e-05	4.32649	-6.40238	6
NP_216677.1	Rv1161	narG	respiratory nitrate reductase subunit alpha NarG	3.04993	-6.32874	1.38631e-06	5.85814	-6.25153	6
NP_217949.1	Rv1387	PPE20	PPE family protein	0	NaN	1.26675e-05	4.89731	-6.003	3
NP_214796.1	Rv0820	phoT	phosphate transporter ATP-binding protein	0	-5.38517	3.97942e-08	7.40018	-5.84795	6
NP_216703.1	Rv0134	ephF	epoxide hydrolase	2.5294	-5.21723	5.81019e-06	5.23581	-5.82553	6
NP_217549.1	Rv0444c		hypothetical protein	0	-4.4024	2.47394e-05	4.60661	-5.63733	6
NP_217300.1	Rv1398c		hypothetical protein	0	NaN	6.69006e-06	5.17457	-5.5928	4
NP_215707.1	Rv0068		short-chain dehydrogenase	2.40805	-4.51873	0.0031711	2.49879	-5.45103	5
NP_218140.1	Rv1180	pks3	polyketide beta-ketoacyl synthase PKS3	2.13164	-3.30687	0.000750205	3.12482	-5.41961	6
NP_217907.1	Rv0133		acetyltransferase	0	NaN	8.85218e-05	4.05295	-5.39107	6	X
YP_177703.1	Rv0669c		hydrolase	0	-5.03887	0.00202102	2.69443	-5.319	6
NP_214735.1	Rv0696		membrane sugar transferase	1.35244	-4.17936	0.000328602	3.48333	-5.3056	6			1
NP_216779.1	Rv3869		hypothetical protein	0.737925	-2.13535	0.00200655	2.69755	-5.29988	6			1
NP_216806.1	Rv1508c		hypothetical protein	1.33688	-3.47738	0.000287614	3.54119	-5.26507	6			10
NP_215143.1	Rv3871		hypothetical protein	1.0099	-2.99737	0.000865087	3.06294	-5.21103	6
NP_214797.1	Rv0570	nrdZ	ribonucleoside-diphosphate reductase large subunit NrdZ	0.594167	-2.30816	0.00383186	2.41659	-5.14114	4
NP_217604.1	Rv3038c		hypothetical protein	1.06894	-3.79192	0.0157199	1.80355	-5.08358	4
NP_216029.1	Rv3870		transmembrane protein	1.35963	-4.13318	0.000352728	3.45256	-5.06595	2			3
NP_216853.1	Rv3407		hypothetical protein	0	NaN	5.73139e-05	4.24174	-5.03202	2
NP_216645.1	Rv3120		hypothetical protein	0	NaN	6.60328e-06	5.18024	-5.02558	3
NP_216512.1	Rv3487c			0	NaN	0.000104465	3.98103	-5.00396	1
NP_214584.1	Rv2385	mbtJ	acetyl hydrolase MBTJ	0	-2.79199	0.000148573	3.82806	-4.91542	1
NP_216060.1	Rv0445c	sigK	RNA polymerase sigma factor SigK	1.59047	-3.03425	0.000164995	3.78253	-4.87164	3
NP_216111.1	Rv3087		hypothetical protein	1.11629	-3.97871	0.00102433	2.98956	-4.86593	2
NP_218405.1	Rv1771		oxidoreductase	2.57669	-4.82006	0.00265039	2.57669	-4.82006	3
NP_217229.1	Rv2338c	moeW	hypothetical protein	1.17494	-3.51629	0.00342815	2.46494	-4.8039	2
NP_218393.1	Rv0136	cyp138	cytochrome P450 138	1.71611	-3.75208	0.00307808	2.51172	-4.78804	6	X
NP_215299.1	Rv3825c	pks2	polyketide synthase	3.16585	-4.78349	0.000682574	3.16585	-4.78349	6
NP_215037.1	Rv1101c		hypothetical protein	0	NaN	0.0003159	3.50045	-4.74177	6			8
NP_216329.1	Rv1509		hypothetical protein	0	NaN	3.50461e-05	4.45536	-4.70342	2
NP_215777.1	Rv1516c		sugar transferase	0	-2.43919	0.00116485	2.93373	-4.60112	1
NP_218150.1	Rv1162	narH	respiratory nitrate reductase subunit beta NarH	0	-3.65994	0.00188751	2.72411	-4.55311	1
NP_218371.1	Rv2073c		short-chain dehydrogenase	0	-3.89218	0.00100328	2.99858	-4.53906	2
NP_215677.1	Rv1397c		hypothetical protein	3.31446	-4.5271	0.000484775	3.31446	-4.5271	3
YP_177806.1	Rv1592c		hypothetical protein	2.20247	-3.96491	0.00289935	2.5377	-4.5242	3
NP_216543.1	Rv0291	mycP3	hypothetical protein	0.312007	-1.26448	0.0102738	1.98827	-4.45791	6			1
NP_216350.1	Rv2074		hypothetical protein	0	-2.74682	0.000444846	3.35179	-4.4457	6
NP_215144.1	Rv3685c	cyp137	cytochrome P450 137	1.03189	-3.35354	0.00641342	2.19291	-4.43468	6
NP_215335.1	Rv0492c		oxidoreductase GMC-type	2.62238	-5.13874	0.00696659	2.15698	-4.42293	3
NP_214648.1	Rv3241c			1.64815	-3.17912	0.00418543	2.37826	-4.40563	4
NP_214958.1	Rv1269c		hypothetical protein	1.54101	-2.82148	0.00770939	2.11298	-4.39921	2		X
NP_215914.1	Rv0654		dioxygenase	1.6455	-4.28317	0.00161991	2.79051	-4.39504	4
NP_216449.1	Rv3885c		hypothetical protein	1.20542	-4.13023	0.0066538	2.17693	-4.36368	1			2
NP_214582.1	Rv0426c		hypothetical protein	3.22049	-4.33933	0.00060188	3.22049	-4.33933	1			2
NP_218251.1	Rv3084	lipR	acetyl-hydrolase/esterase LipR	0.393219	-1.18694	0.00597806	2.22344	-4.30441	1
NP_215162.1	Rv3329			0.954872	-2.87505	0.00160129	2.79553	-4.25954	2
NP_216396.1	Rv0042c		MarR family transcriptional regulator	0.521741	-1.5292	0.00428973	2.36757	-4.25792	6
NP_215696.1	Rv1181	pks4	polyketide beta-ketoacyl synthase PKS4	2.52572	-4.23953	0.00298044	2.52572	-4.23953	4
NP_217955.1	Rv0010c		hypothetical protein	0	NaN	0.000103003	3.98715	-4.23792	6			2
NP_217231.1	Rv1393c		monoxygenase	0.725388	-2.53778	0.00345287	2.46182	-4.17391	6	X
NP_214933.1	Rv0493c		hypothetical protein	0.969957	-2.44752	0.0223671	1.65039	-4.15251	6	X
NP_216102.1	Rv3895c		hypothetical protein	0	-0.100329	0.00340071	2.46843	-4.12873	3			1
NP_217646.1	Rv0864	moaC	molybdenum cofactor biosynthesis protein MoaC	0.835824	-2.47186	0.00195587	2.70866	-4.12011	2
NP_215481.2	Rv0891c		transcriptional regulatory protein	0	NaN	0.00011797	3.92823	-4.07691	1
NP_217149.1	Rv1179c		hypothetical protein	1.21508	-2.78316	0.00276618	2.55812	-4.02284	1
NP_217513.1	Rv1194c		hypothetical protein	0	NaN	0.00065793	3.18182	-4.00015	1
NP_214647.1	Rv3479		hypothetical protein	1.98458	-3.64164	0.000333196	3.4773	-3.98154	6			3
NP_215183.1	Rv3726		dehydrogenase	2.17119	-3.96179	0.00674233	2.17119	-3.96179	4
NP_215145.1	Rv1594	nadA	quinolinate synthetase	0.496957	-2.08194	0.0128472	1.89119	-3.9285	2
NP_215210.1	Rv1871c		hypothetical protein	2.40387	-3.91164	0.00394575	2.40387	-3.91164	5
NP_216503.1	Rv3877		transmembrane protein	0.639924	-1.3984	0.00276567	2.5582	-3.86759	2			11
NP_216388.1	Rv1977		hypothetical protein	0	-2.95935	0.00188977	2.72359	-3.86692	2			1
NP_216258.1	Rv1016c	lpqT	lipoprotein LpqT	0	NaN	0.00584534	2.23319	-3.84808	4				X
NP_217293.1	Rv1535		hypothetical protein	0	NaN	0.00533949	2.2725	-3.83458	7
NP_217470.1	Rv1095	phoH2	PhoH-like protein PhoH2 (phosphate starvation-inducible protein PsiH)	0.920971	-2.64433	0.0251056	1.60023	-3.82542	2
NP_218386.1	Rv0072		glutamine-transport transmembrane protein ABC transporter	2.28362	-3.8106	0.00520451	2.28362	-3.8106	3			4
NP_217829.1	Rv1596	nadC	nicotinate-nucleotide pyrophosphorylase	1.06542	-2.11197	0.00471194	2.3268	-3.79248	2
NP_216965.1	Rv0220	lipC	esterase	0.442069	-2.01737	0.0152149	1.81773	-3.79062	2
NP_217686.1	Rv0276		hypothetical protein	0	NaN	0.0036959	2.43228	-3.7902	7
NP_216024.1	Rv0392c	ndhA	membrane NADH dehydrogenase	2.2658	-3.76009	0.00542251	2.2658	-3.76009	3			1
NP_218388.1	Rv2045c	lipT	carboxylesterase LipT	1.42885	-3.01723	0.01844	1.73424	-3.73692	2
NP_216542.1	Rv3408		hypothetical protein	0	-2.23189	0.00483415	2.31568	-3.73606	4
NP_217256.1	Rv0914c		acetyl-CoA acetyltransferase	1.05894	-2.56683	0.0159687	1.79673	-3.72481	6
NP_218045.1	Rv0166	fadD5	long-chain-fatty-acid--CoA ligase	0	-2.80781	0.000987166	3.00561	-3.70178	2
NP_215084.1	Rv2289	cdh	CDP-diacylglycerol pyrophosphatase	2.51283	-3.689	0.00307022	2.51283	-3.689	1			1
NP_217894.1	Rv1514c		hypothetical protein	0	-1.47653	0.000688399	3.16216	-3.62626	6
NP_217210.1	Rv2822c		hypothetical protein	0	NaN	0.00528032	2.27734	-3.6025	1
NP_217554.1	Rv1751		hypothetical protein	2.01747	-3.58836	0.00960572	2.01747	-3.58836	2
NP_218387.1	Rv3894c		hypothetical protein	1.67923	-3.33415	0.0012256	2.91165	-3.5203	4			2
NP_217924.1	Rv0818		transcriptional regulatory protein	1.74708	-2.5618	0.017885	1.74751	-3.50725	6
NP_217636.1	Rv2031c	hspX	heat shock protein hspX	2.31579	-3.50586	0.00483292	2.31579	-3.50586	4
NP_216521.1	Rv0936	pstA2	phosphate ABC transporter transmembrane protein	0	NaN	0.0255988	1.59178	-3.45155	1			6
NP_218004.1	Rv3480c		hypothetical protein	1.60105	-2.88272	0.0119201	1.92372	-3.45047	6
NP_214890.1	Rv3083		monooxygenase	0	-0.58389	0.0130098	1.88573	-3.41401	4
NP_215058.1	Rv1153c	omt	O-methyltransferase	0.848934	-1.88745	0.00164835	2.78295	-3.41091	1
NP_216802.1	Rv3908		hypothetical protein	0.492591	-1.73231	0.0116386	1.9341	-3.37017	6
NP_218380.1	Rv2113		hypothetical protein	0	NaN	0.0150727	1.82181	-3.36327	6			8
NP_214939.1	Rv3059	cyp136	cytochrome P450	1.13427	-2.86399	0.0342507	1.46533	-3.36299	6
NP_218279.1	Rv2137c		hypothetical protein	0	NaN	0.00140081	2.85362	-3.35822	6
NP_215901.1	Rv3883c	mycP1	membrane-anchored mycosin MYCP1	0	NaN	0.0109964	1.95875	-3.35667	6			1
NP_217923.1	Rv1920		hypothetical protein	0.454397	-0.864147	0.00459251	2.33795	-3.324	2	X
NP_216739.1	Rv3796		hypothetical protein	0	NaN	0.0178974	1.74721	-3.32093	6		X
YP_177876.1	Rv0931c	pknD	Ser/Thr protein kinase D	1.64606	-3.26975	0.0225912	1.64606	-3.26975	6			1
NP_214959.1	Rv3254		hypothetical protein	1.37981	-2.73134	0.0187197	1.7277	-3.20284	4
NP_215892.1	Rv2862c		hypothetical protein	0	-2.58759	0.00380838	2.41926	-3.18508	4
NP_217603.1	Rv0985c	mscL	large-conductance mechanosensitive channel	1.61092	-2.2426	0.0241752	1.61663	-3.17189	5			2
NP_215104.1	Rv1096		glycosyl hydrolase	0.466834	-1.27016	0.00640664	2.19337	-3.16012	2			1
NP_214725.1	Rv3362c		ATP/GTP-binding protein	0	NaN	0.000763994	3.11691	-3.15449	4
NP_216287.1	Rv0292		transmembrane protein	2.29175	-3.13182	0.00510799	2.29175	-3.13182	5			2
NP_214938.1	Rv3478	PPE60	PE family protein	0	NaN	0.0301224	1.52111	-3.12369	4
NP_217343.1	Rv1882c		short-chain dehydrogenase	1.05	-2.4994	0.0420117	1.37663	-3.11025	2
NP_216854.1	Rv0284		hypothetical protein	2.18554	-3.10629	0.00652319	2.18554	-3.10629	5			1
NP_216203.1	Rv2958c		glycosyl transferase family protein	0.0923599	-0.500731	0.0496192	1.30435	-3.10596	8
NP_215148.1	Rv2297		hypothetical protein	1.14199	-2.09315	0.0462253	1.33512	-3.07505	4
NP_214650.1	Rv0934	pstS1	phosphate ABC transporter substrate-binding protein	1.48936	-3.0709	0.0324071	1.48936	-3.0709	5				X
NP_218342.1	Rv1698		hypothetical protein	1.74315	-3.06042	0.0180655	1.74315	-3.06042	5			1
NP_215617.1	Rv2731		hypothetical protein	1.76563	-3.05876	0.0171542	1.76563	-3.05876	4
NP_217220.1	Rv3432c	gadB	glutamate decarboxylase GadB	1.07401	-2.18958	0.0454046	1.3429	-3.04829	6
NP_217088.1	Rv0282		hypothetical protein	1.2034	-1.97284	0.0144374	1.84051	-3.0346	4
NP_217426.1	Rv3033		hypothetical protein	0.655306	-1.73735	0.0180834	1.74272	-2.99944	4
NP_217724.1	Rv2784c	lppU	lipoprotein LppU	0.24985	-0.487989	0.00797811	2.0981	-2.97355	4				X
NP_216025.1	Rv3390	lpqD	lipoprotein LpqD	1.53058	-2.97235	0.0294727	1.53058	-2.97235	4			1	X
NP_216008.1	Rv0255c	cobQ1	cobyric acid synthase	0.692167	-2.04008	0.0494652	1.3057	-2.9686	6
NP_216032.2	Rv2263		short-chain dehydrogenase	1.99112	-2.94812	0.0102066	1.99112	-2.94812	7
NP_214726.1	Rv0629c	recD	exonuclease V subunit alpha	0	NaN	0.043473	1.36178	-2.91317	2
NP_215678.1	Rv0283		hypothetical protein	1.86323	-2.89727	0.0137016	1.86323	-2.89727	2			1
NP_217450.1	Rv3088		hypothetical protein	1.06293	-2.47218	0.0415078	1.38187	-2.87737	6
NP_218105.1	Rv2337c		hypothetical protein	0	-0.840529	0.0205698	1.68677	-2.87307	4
NP_216589.1	Rv2129c		short-chain dehydrogenase	2.31096	-2.84803	0.00488697	2.31096	-2.84803	2
NP_215913.1	Rv1996		hypothetical protein	1.47654	-2.82795	0.033378	1.47654	-2.82795	2
NP_216108.1	Rv0070c	glyA	serine hydroxymethyltransferase	1.37271	-2.82626	0.0423926	1.37271	-2.82626	6
NP_216626.1	Rv1595	nadB	L-aspartate oxidase	0	NaN	0.0190012	1.72122	-2.81025	4
NP_214805.1	Rv2713	sthA	soluble pyridine nucleotide transhydrogenase	1.42576	-2.80512	0.037518	1.42576	-2.80512	6
NP_216590.1	Rv0523c		hypothetical protein	1.60203	-2.77534	0.0250017	1.60203	-2.77534	2
NP_216731.1	Rv1813c		hypothetical protein	0	0.707993	0.0413143	1.3839	-2.76964	2		X	1
NP_218202.1	Rv1261c		hypothetical protein	1.53124	-2.75468	0.0294279	1.53124	-2.75468	4
NP_214857.1	Rv3633		hypothetical protein	0	-2.49697	0.00608107	2.21602	-2.75422	2
NP_215006.2	Rv3854c	ethA	monooxygenase	1.372	-2.75094	0.042462	1.372	-2.75094	4
NP_217758.1	Rv2027c		histidine kinase response regulator	1.65966	-1.93155	0.0370715	1.43096	-2.72577	4
NP_216294.1	Rv1834		hydrolase	0	-1.6217	0.00442466	2.35412	-2.67365	2
NP_214768.1	Rv0630c	recB	exonuclease V subunit beta	0	-2.06122	0.00741071	2.13014	-2.66479	3
NP_217447.1	Rv1933c	fadE18	acyl-CoA dehydrogenase	0	NaN	0.0206125	1.68587	-2.64194	6
NP_215785.1	Rv3734c		hypothetical protein	1.35771	-2.61205	0.0438824	1.35771	-2.61205	2
NP_216688.1	Rv0648		alpha-mannosidase	0.978466	-2.55381	0.0209817	1.67816	-2.6076	6
NP_215168.1	Rv1880c			1.32976	-2.54657	0.0467994	1.32976	-2.54657	2
NP_218402.1	Rv3438		hypothetical protein	1.3645	-2.53723	0.0432016	1.3645	-2.53723	2
NP_214940.1	Rv2715		hydrolase	1.54879	-2.53075	0.0282625	1.54879	-2.53075	1
NP_215507.1	Rv0419	lpqM	lipoprotein peptidase LpqM	1.04356	-2.12657	0.043476	1.36175	-2.48903	6			1	X
NP_215204.1	Rv1586c		phiRv1 integrase	0	-2.00276	0.0377859	1.42267	-2.48828	6	X
NP_217600.1	Rv3130c	tgs1	triacylglycerol synthase	1.52738	-2.47633	0.0296907	1.52738	-2.47633	6
NP_217846.1	Rv0966c		hypothetical protein	1.48407	-2.45509	0.0328042	1.48407	-2.45509	2
NP_217444.1	Rv2633c		hypothetical protein	0	NaN	0.0295924	1.52882	-2.41714	6
NP_215060.1	Rv2997		dehydrogenase	0.997625	-1.90057	0.0286655	1.54264	-2.41442	6
NP_214822.1	Rv0631c	recC	exonuclease V subunit gamma	0.320841	-0.978292	0.0375907	1.42492	-2.41088	4
NP_217821.1	Rv1987		chitinase	0	NaN	0.0442171	1.35441	-2.40902	7			1
NP_214556.1	Rv1872c	lldD2	L-lactate dehydrogenase (cytochrome) LldD2	1.81273	-2.40151	0.0153911	1.81273	-2.40151	6
YP_177768.1	Rv1742		hypothetical protein	0	NaN	0.0237148	1.62498	-2.38852	7
NP_214980.1	Rv2777c		hypothetical protein	0.220544	-0.685369	0.0250132	1.60183	-2.38523	7
NP_217481.1	Rv2954c		hypothetical protein	0	NaN	0.0115696	1.93668	-2.34559	7
NP_218184.1	Rv3312c		hypothetical protein	0.584303	-1.00549	0.00880238	2.0554	-2.34241	4
NP_215697.1	Rv2449c		hypothetical protein	1.30079	-2.26662	0.0500276	1.30079	-2.26662	6
NP_216121.1	Rv3170	aofH	flavin-containing monoamine oxidase	0	NaN	0.037258	1.42878	-2.26513	2
NP_214524.1	Rv2026c		hypothetical protein	1.59738	-2.25472	0.0252709	1.59738	-2.25472	1
NP_215909.1	Rv2740		hypothetical protein	1.6716	-2.14233	0.021301	1.6716	-2.14233	4
NP_215007.1	Rv3528c		hypothetical protein	1.72327	-2.11817	0.0189117	1.72327	-2.11817	1
NP_217449.1	Rv3377c		cyclase	0	NaN	0.0267609	1.5725	-2.09837	4
YP_177899.1	Rv2694c		hypothetical protein	0	NaN	0.0396433	1.40183	-2.04971	6
NP_218412.1	Rv2005c		hypothetical protein	1.82566	-2.03493	0.0149396	1.82566	-2.03493	6
NP_217617.1	Rv0376c		hypothetical protein	0	0.611445	0.0445266	1.35138	-1.96633	6
NP_216653.1	Rv0544c		transmembrane protein	1.35067	-1.49082	0.125631	0.900904	-1.70258	7			2
NP_215379.1	Rv2286c		hypothetical protein	1.34086	-1.66335	0.0456184	1.34086	-1.66335	6
NP_216196.1	Rv3863		hypothetical protein	0	NaN	0.0181046	1.74221	-1.56738	6
NP_215285.1	Rv0425c	ctpH	metal cation transporting P-type ATPase CtpH	0	-0.953508	0.0365309	1.43734	-1.55862	6			3
NP_217400.1	Rv3762c		hydrolase	0	-1.80981	0.0160472	1.7946	-1.50382	4
NP_217299.1	Rv1385	pyrF	orotidine 5'-phosphate decarboxylase	0	NaN	0.0190704	1.71964	-1.45988	2
NP_217732.1	Rv3406		dioxygenase	0	-3.74117	0.0353989	1.45101	-1.43946	4
NP_214573.1	Rv2223c		exported protease	0	NaN	0.0290563	1.53676	-1.34409	4			1
NP_217555.1	Rv1376		hypothetical protein	0	-2.15819	0.0354479	1.45041	-1.28239	6
NP_214550.1	Rv0590	mce2B	MCE-family protein MCE2B	0	NaN	0.0190187	1.72082	-1.03999	4			1
NP_217448.1	Rv0211	pckA	phosphoenolpyruvate carboxykinase	0	NaN	0.0233668	1.6314	-1.03634	6
NP_218400.1	Rv0424c		hypothetical protein	1.65387	-4.18583	0.850631	0.0702586	-0.449999	7
NP_216436.1	Rv2827c		hypothetical protein	2.37752	1.57859	0.89227	0.0495036	-0.0845486	7
YP_178016.1	Rv1687c		ABC transporter ATP-binding protein	2.09686	2.66359	0.982743	0.00756012	0.0256728	7
NP_215446.1	Rv0634c		glyoxalase II	1.83155	3.18676	0.521198	0.282997	0.737846	6
NP_218406.1	Rv2704		hypothetical protein	0	NaN	0.0328246	1.4838	1.0433	7
NP_215586.1	Rv2572c	aspS	aspartyl-tRNA synthetase	0	NaN	0.0307992	1.51146	1.16824	2
NP_216428.1	Rv2910c		hypothetical protein	0	NaN	0.0435392	1.36112	1.24147	3
NP_216123.1	Rv3208		TetR family transcriptional regulator	0	NaN	0.0339336	1.46937	1.29908	2
NP_215009.1	Rv1492	mutA	methylmalonyl-CoA mutase small subunit	0	1.02165	0.0318295	1.49717	1.35141	2
NP_216882.1	Rv0212c	nadR	transcriptional regulator NadR	1.12423	1.22597	0.0183705	1.73588	1.39496	2
NP_215406.1	Rv2934	ppsD	phenolpthiocerol synthesis type-I polyketide synthase PPSD	1.30953	1.56198	0.0490309	1.30953	1.56198	4
NP_215190.1	Rv3588c		carbonic anhydrase	0	NaN	0.0451107	1.34572	1.63345	6
NP_217771.1	Rv2110c	prcB	proteasome PrcB	1.90228	2.599	0.145532	0.837041	1.6862	7
NP_215695.1	Rv2215	dlaT	dihydrolipoamide acetyltransferase	1.36811	1.78975	0.042844	1.36811	1.78975	6
NP_217378.1	Rv0343	iniC	isoniazid inductible gene protein INIC	1.31786	2.74705	0.226708	0.644534	1.83107	6
NP_215500.1	Rv1778c		hypothetical protein	1.59982	3.08516	0.195952	0.707851	1.83729	6
YP_177873.1	Rv0254c	cobU	bifunctional cobinamide kinase/cobinamide phosphate guanylyltransferase	0	NaN	0.0193932	1.71235	1.85546	6	X
NP_215710.1	Rv2931	ppsA	phenolpthiocerol synthesis type-I polyketide synthase PPSA	1.37996	1.89008	0.0416908	1.37996	1.89008	4
NP_217108.1	Rv2172c		hypothetical protein	0	0.552867	0.0135838	1.86698	1.99056	1
NP_216067.1	Rv0992c		hypothetical protein	0	1.17046	0.0462988	1.33443	2.10787	6
NP_217996.2	Rv0690c		hypothetical protein	1.77088	2.21984	0.0169481	1.77088	2.21984	6
NP_214662.1	Rv2928	tesA	thioesterase	0.503076	1.50906	0.0293096	1.53299	2.24341	6
NP_217312.1	Rv0546c		hypothetical protein	0	NaN	0.031828	1.49719	2.26498	6	X
NP_218243.1	Rv0308		hypothetical protein	2.10973	2.27171	0.0077673	2.10973	2.27171	6			6
NP_217736.1	Rv3304		hypothetical protein	0	NaN	0.00892586	2.04935	2.28183	1
NP_216110.1	Rv0928	pstS3	phosphate ABC transporter substrate-binding protein	2.17422	2.36165	0.00669545	2.17422	2.36165	3				X
NP_215610.1	Rv0466		hypothetical protein	0.536469	1.3603	0.0323601	1.48999	2.4115	1
NP_216129.1	Rv2965c	coaD	phosphopantetheine adenylyltransferase	0	NaN	0.0209609	1.67859	2.44665	4
NP_218334.1	Rv3667	acs	acetyl-CoA synthetase	1.11272	2.29959	0.0404706	1.39286	2.49526	2
NP_216387.1	Rv1605	hisF	imidazole glycerol phosphate synthase subunit HisF	1.31524	1.89455	0.0269315	1.56974	2.50214	2
NP_218394.1	Rv2933	ppsC	phenolpthiocerol synthesis type-I polyketide synthase PPSC	1.89925	2.51769	0.012611	1.89925	2.51769	1
NP_216815.1	Rv2685	arsB1	arsenic-transport integral membrane protein ArsB1	0.438624	0.941762	0.0281624	1.55033	2.51927	2			9
NP_216493.1	Rv3101c	ftsX	cell division protein FtsX	1.91202	2.573	0.0122456	1.91202	2.573	5			4
NP_217740.1	Rv1680		hypothetical protein	0.852852	1.46112	0.0287753	1.54098	2.62394	2
NP_218384.1	Rv0771		4-carboxymuconolactone decarboxylase	0	NaN	0.0111368	1.95324	2.6359	3
NP_216166.1	Rv2884		transcriptional regulatory protein	0.626638	1.39677	0.0173325	1.76114	2.65272	6	X
NP_215532.1	Rv2783c	gpsI	polynucleotide phosphorylase	2.47207	2.66981	0.00337233	2.47207	2.66981	4
NP_216368.1	Rv3216		acetyltransferase	0	0.486031	0.0181222	1.74179	2.67613	6
NP_216327.1	Rv0059		hypothetical protein	0.929552	1.92698	0.0231958	1.63459	2.68564	5
NP_214580.1	Rv3039c	echA17	enoyl-CoA hydratase	0	2.60794	0.0474537	1.32373	2.70264	2
NP_216431.1	Rv0036c		hypothetical protein	0	NaN	0.0351747	1.45377	2.70537	2
NP_216051.1	Rv2932	ppsB	phenolpthiocerol synthesis type-I polyketide synthase PPSB	1.43647	2.70539	0.0366041	1.43647	2.70539	4
NP_216945.1	Rv3889c		hypothetical protein	0	2.85256	0.016471	1.78328	2.7296	6	X
YP_177728.1	Rv1070c	echA8	enoyl-CoA hydratase	0.372515	1.65953	0.038944	1.40956	2.74808	6	X
NP_215611.1	Rv1912c	fadB5	oxidoreductase FADB5	1.61693	2.75898	0.0241585	1.61693	2.75898	2	X
NP_216170.1	Rv1607	chaA	ionic transporter integral membrane protein chaA	0	1.80819	0.0428953	1.36759	2.82194	4			11
NP_217799.1	Rv0495c		hypothetical protein	1.2706	2.28534	0.00319382	2.49569	2.83567	2
NP_214586.1	Rv2366c		transmembrane protein	1.63013	2.94707	0.0234353	1.63013	2.94707	7			3
NP_216112.1	Rv0676c	mmpL5	transmembrane transport protein MmpL5	1.65368	2.96009	0.0221983	1.65368	2.96009	1			12
NP_217464.1	Rv2364c	era	GTP-binding protein Era	0	NaN	0.00532586	2.27361	3.03925	2
NP_217913.1	Rv2592c	ruvB	Holliday junction DNA helicase RuvB	0.254358	0.946435	0.0160398	1.7948	3.18077	4
NP_214734.1	Rv1551	plsB1	glycerol-3-phosphate acyltransferase	1.79044	2.93629	0.00664171	2.17772	3.22911	1
NP_218239.2	Rv0148		short-chain type dehydrogenase/reductase	0.892188	2.09734	0.024581	1.6094	3.25624	6	X
NP_217473.1	Rv2796c	lppV	lipoprotein LppV	0.458564	1.34711	0.00672744	2.17215	3.26607	6	X			X
NP_215526.1	Rv3220c		two component sensor kinase	0.047996	0.205905	0.0320959	1.49355	3.33454	4
NP_214790.1	Rv1094	desA2	acyl-ACP desaturase	1.63901	2.73722	0.00348041	2.45837	3.33571	2
NP_217138.1	Rv1613	trpA	tryptophan synthase subunit alpha	0.642507	1.76966	0.0162099	1.79022	3.34028	6
NP_215776.1	Rv3817		phosphotransferase	0	NaN	0.00100418	2.99819	3.34536	7	X
NP_214906.1	Rv2299c	htpG	heat shock protein 90	1.44235	3.35211	0.0361119	1.44235	3.35211	7
YP_177735.1	Rv3224		short-chain dehydrogenase	1.06774	2.31196	0.0154964	1.80977	3.36785	4
NP_217854.2	Rv3867		hypothetical protein	0	-0.565088	0.00843432	2.07395	3.37033	4
NP_217505.1	Rv1650	pheT	phenylalanyl-tRNA synthetase subunit beta	0.599833	1.67931	0.00445841	2.35082	3.38184	6
NP_216561.1	Rv1852	ureG	urease accessory protein ureG	1.75977	2.78995	0.00927748	2.03257	3.38884	2
NP_216000.1	Rv1811	mgtC	Mg2+ transport P-type ATPase C	0	NaN	6.37823e-05	4.1953	3.39544	1			4
NP_215441.1	Rv0066c	icd2	isocitrate dehydrogenase	0.775576	2.04763	0.0110741	1.95569	3.42206	1
NP_217925.1	Rv1915	aceAa	isocitrate lyase	1.89567	3.50094	0.0127154	1.89567	3.50094	2
NP_217855.1	Rv2429	ahpD	alkyl hydroperoxide reductase	0.214928	0.769182	0.0133838	1.87342	3.52112	2
NP_217500.1	Rv0467	icl	isocitrate lyase	0.0704777	0.30991	0.0248365	1.60491	3.52291	2
NP_216718.1	Rv1654	argB	acetylglutamate kinase	0	NaN	0.00529578	2.27607	3.52568	7
NP_218193.1	Rv3282	maf	Maf-like protein	0	NaN	0.0160037	1.79578	3.54264	5
NP_217454.1	Rv2948c	fadD22	acyl-CoA synthetase	0.9817	2.3323	0.0221376	1.65487	3.55655	5
NP_216851.1	Rv3396c	guaA	GMP synthase	0.0110983	0.0675314	0.0500403	1.30068	3.58181	6
NP_217396.1	Rv3722c		hypothetical protein	0	2.79094	0.00674544	2.17099	3.59227	6
NP_215429.1	Rv2957		glycosyl transferase family protein	1.84355	3.12526	0.00705212	2.15168	3.69655	6			1
NP_216184.1	Rv1010	ksgA	dimethyladenosine transferase	0.876139	2.40216	0.0259771	1.58541	3.74075	6
NP_214680.1	Rv2622		methyltransferase	2.56776	3.75684	0.00270545	2.56776	3.75684	3
NP_217405.1	Rv1260		hypothetical protein	0.752321	2.48873	0.00338213	2.47081	3.7949	3
NP_217395.1	Rv0527	ccdA	cytochrome C-type biogenesis protein CcdA	0	1.00171	0.00530127	2.27562	3.84424	4	X		7
NP_216160.1	Rv3337		hypothetical protein	0	NaN	2.37602e-05	4.62415	3.86307	1
NP_216805.1	Rv2989		transcriptional regulatory protein	2.10566	3.07771	0.00716853	2.14457	3.89669	2
NP_216030.1	Rv1484	inhA	enoyl-ACP reductase	1.69066	3.15268	0.00292732	2.53353	3.93342	2
NP_214928.1	Rv0926c		hypothetical protein	0	1.8298	0.000920471	3.03599	3.97778	2
NP_217561.1	Rv3338		hypothetical protein	0	0.564008	0.00807365	2.09293	4.01057	2
NP_217338.1	Rv2984	ppk	polyphosphate kinase	2.12142	4.1148	0.000356033	3.44851	4.03223	3
NP_217136.1	Rv2202c	cbhK	carbohydrate kinase CbhK	0.614611	1.46378	0.00305007	2.51569	4.06276	6
NP_216267.1	Rv3676		Crp/Fnr family transcriptional regulator	1.66533	3.19777	0.0136113	1.8661	4.07818	1
NP_217511.1	Rv2938	drrC	daunorubicin-DIM-transport integral membrane protein ABC transporter DrrC	0.0495526	-0.188269	0.0274082	1.56212	4.09166	2			6
NP_217751.1	Rv2335	cysE	serine acetyltransferase CysE	0.381346	1.3496	0.00718886	2.14334	4.23095	4
NP_216432.1	Rv2880c		hypothetical protein	0	NaN	0.00109318	2.96131	4.24277	3
NP_216404.1	Rv1668c		macrolide-transport ATP-binding protein ABC transporter	0	NaN	8.42442e-05	4.07446	4.24589	4
NP_218411.1	Rv2889c	tsf	elongation factor Ts	2.0307	3.68295	0.000254507	3.5943	4.31736	2
NP_217750.1	Rv2879c		hypothetical protein	0.583399	1.7677	0.00348057	2.45835	4.45011	2
NP_215333.1	Rv1644	tsnR	23S rRNA methyltransferase	1.69492	3.98798	0.000750309	3.12476	4.48742	2
NP_216547.1	Rv0414c	thiE	thiamine-phosphate pyrophosphorylase	1.78458	4.52842	0.000764276	3.11675	4.70027	2
NP_214763.1	Rv3045	adhC	NADP-dependent alcohol dehydrogenase ADHC	0.343466	1.32386	0.0070961	2.14898	4.91722	1
NP_215451.1	Rv2620c		transmembrane protein	3.19156	4.23684	0.000768316	3.11446	4.95856	3			4
NP_217997.1	Rv2995c	leuB	3-isopropylmalate dehydrogenase	2.52692	4.36779	0.00148614	2.82794	4.95933	8
NP_217599.1	Rv3234c		hypothetical protein	1.3822	3.159	0.000276121	3.5589	4.97874	4
NP_216291.1	Rv1916	aceAb	isocitrate lyase	0	0.626688	0.00118282	2.92708	4.98326	1
NP_215669.1	Rv1888c		transmembrane protein	1.60512	3.55209	0.000143648	3.8427	4.98487	3			3
NP_218425.1	Rv3233c		hypothetical protein	1.56547	3.40894	0.000182785	3.73806	5.15332	1
NP_216183.1	Rv0249c		succinate dehydrogenase membrane anchor subunit	0.264601	1.30086	0.0423799	1.37284	5.16886	1			5
NP_217462.1	Rv1775		hypothetical protein	0	4.04258	0.000276287	3.55864	5.17589	3
NP_216290.1	Rv1667c		macrolide-transport ATP-binding protein ABC transporter	0	NaN	2.78625e-06	5.55498	5.24091	6
NP_216629.1	Rv2946c	pks1	polyketide synthase	2.96162	5.26201	0.0010924	2.96162	5.26201	7
NP_217575.1	Rv1774		oxidoreductase	2.57057	5.67349	6.89223e-05	4.16164	5.39662	7
NP_216944.1	Rv2428	ahpC	alkyl hydroperoxide reductase	0	NaN	0.000122293	3.9126	6.22146	3
NP_215298.1	Rv0784		hypothetical protein	0	NaN	5.6482e-06	5.24809	6.47434	6

## Sheet: Table 2
Protein ID	Locus	Gene Name	Description/Function	Regions of deletion (RD)	Filter1: ≥ 2 peptides in 4 of 6 runs for BCG	Filter1: ≥ 2 peptides in 4 of 6 runs forRv	Total number of BCG peptides in all runs	Total numberof Rv peptides in all runs
NP_215143.1	Rv3871		hypothetical protein	1RD	0	6	0	66
NP_218391.1	Rv3874	esxB	protein EsxB	1RD	0	0	0	2
NP_216214.1	Rv3876		hypothetical protein	1RD	0	6	0	14
NP_216388.1	Rv3877		transmembrane protein	1RD	0	6	0	94
NP_214806.1	Rv1978		hypothetical protein	2RD/7RD	0	6	0	82
NP_217821.1	Rv1987		chitinase	2RD	0	0	0	5
NP_216094.1	Rv1578c		phiRv1 phage protein	3RD	0	0	0	8
NP_216099.1	Rv1583c		phiRv1 phage protein	3RD	0	4	0	10
NP_215204.1	Rv1586c		phiRv1 integrase	3RD	0	3	0	1
NP_216806.1	Rv1508c		hypothetical protein	4RD	0	6	0	20
NP_216329.1	Rv1509		hypothetical protein	4RD	0	6	0	26
YP_177770.1	Rv1513		hypothetical protein	4RD	0	6	0	23
NP_215777.1	Rv1516c		sugar transferase	4RD	0	6	0	18
NP_217894.1	Rv1514c		hypothetical protein	4RD	0	4	0	26
NP_216031.1	Rv1515c		hypothetical protein	4RD	0	2	0	1
NP_216028.1	Rv1512	epiA	nucleotide-sugar epimerase epiA	4RD	0	0	0	4
NP_216863.1	Rv2347c	esxP	ESAT-6 like protein ESXP (ESAT-6 like protein 7)	5RD	0	0	0	1
NP_216865.1	Rv2349c	plcC	phospholipase C 3 PLCC	5RD	0	0	0	2
NP_216866.1	Rv2350c	plcB	membrane-associated phospholipase C	5RD	0	1	0	1
NP_216867.1	Rv2351c	plcA	membrane-associated phospholipase C	5RD	0	0	0	1
NP_216588.1	Rv2072c	cobL	precorrin-6y methyltransferase CobL	9RD	0	0	0	3
NP_218371.1	Rv2073c		short-chain dehydrogenase	9RD	0	5	0	23
NP_216350.1	Rv2074		hypothetical protein	9RD	0	6	0	31
NP_216388.1	Rv1977		hypothetical protein	7RD	0	6	0	37
NP_218134.1	Rv3617	ephA	epoxide hydrolase	8RD	0	0	0	1
NP_214798.1	Rv3623	lpqG	lipoprotein LpqG	8RD	0	5	0	28
NP_214735.1	Rv0221		hypothetical protein	10RD	0	6	0	64
NP_214736.1	Rv0222	echA1	enoyl-CoA hydratase	10RD	0	0	0	1
NP_217174.1	Rv2658c		prophage protein	11RD	0	2	0	6
NP_217175.1	Rv2659c		phiRv2 prophage integrase	11RD	0	1	0	4
NP_216645.1	Rv3120		hypothetical protein	12RD	0	5	0	12
NP_215771.1	Rv1255c		transcriptional regulatory protein	13RD	0	0	0	1
NP_215772.1	Rv1256c	cyp130	cytochrome P450 130 CYP130	13RD	0	0	0	2
YP_177976.1	Rv1769		hypothetical protein	14RD	0	6	0	31
NP_215612.1	Rv1770		hypothetical protein	14RD	0	6	0	129
NP_218405.1	Rv1771		oxidoreductase	14RD	0	6	0	68
